# Supplementary material
Source: HighWire-hosted journal article supplement (http://www.cmajopen.ca/highwire/filestream/81009/field_highwire_adjunct_files/0/open-2015-0073-original-submission.pdf)
Supplement: open-2015-0073-original-submission.pdf [file open-2015-0073-original-submission.pdf]

1  
2  
3 **Effect of Unintentional Cyclophosphamide Under-dosing on Diffuse Large B-Cell**  
4  
5 **Lymphoma Response**  
6  
7

8 **Authors.** M. Al-Ahmadi MBBS <sup>1,2</sup>, A. Lazo-Langner MD MSc<sup>1,3</sup>, J. Mangel MD <sup>1</sup>, A.  
9 Dhalla BSc.PhM<sup>4</sup>, K. Liu BSc<sup>1</sup>, L. Minuk MD <sup>1</sup>.  
10  
11  
12  
13

14  
15 **Institution.** <sup>1</sup>Department of Medicine, Division of Hematology, University of Western  
16 Ontario, London ON, Canada; <sup>2</sup>Department of Oncology, King Abdulaziz Medical City,  
17 Jeddah, Saudi Arabia, <sup>3</sup>Department of Epidemiology and Biostatistics, University of  
18 Western Ontario, London ON, Canada; <sup>4</sup>Pharmacy Services, London Regional Cancer  
19 Program, London ON, Canada.  
20  
21  
22  
23  
24  
25  
26  
27  
28  
29

30 **Correspondence.** Leonard Minuk MD FRCPC Department of Medicine, Division of  
31 Hematology, 800 Commissioners Rd E, Room E6 219, London, Ontario Canada, N6A  
32 5W9  
33  
34

35  
36  
37 Telephone. 519 685 8500 Ext.  
38

39  
40 Fax. 519 685 8294  
41

42  
43 E-mail. [Leonard.minuk@lhsc.on.ca](mailto:Leonard.minuk@lhsc.on.ca)  
44  
45

46  
47 Word count (excluding references): 1561  
48

49  
50 Word count abstract: 250  
51  
52  
53  
54  
55  
56  
57  
58  
59  
60

**Abstract**

**Background:** Between March 2012 and March 2013, a miscommunication in labelling between the drug compounder supplier and cancer centre pharmacies resulted in accidental over-dilution of cyclophosphamide and gemcitabine utilized by several cancer centers in Canada. At our centre, 177 hematology patients were affected among whom the largest subset of patients was those with diffuse large B cell lymphoma (DLBCL). In this study, we evaluated the effect of such under-dosing on disease response.

**Methods:** We conducted a retrospective cohort study of all patients with DLBCL who received at least one chemotherapy cycle containing diluted cyclophosphamide at our centre and compared them to a historical group of patients matched by stage and age. The primary study outcome was event-free survival, (a composite of disease progression or death). Secondary outcomes included complete remission, and overall response rate. Groups were compared using unpaired Student's t-test, Chi-squared or Fisher's exact tests, as appropriate. Survival analysis was done using the Kaplan-Meier method.

**Results:** Event-free survival was no different between groups (log-rank  $P=0.999$ ). At a median follow up of 548 days, progression or death occurred in 21/77 cases (27.3%) and 24/74 controls (32%) ( $P= 0.523$ ). At the end of treatment, complete remission was achieved in 41 cases (53.2%) and 43 controls (57.3%) ( $P= 0.612$ ) whereas overall response rate was 71.4% in cases and 66.7% in controls ( $P=0.525$ ).

**Conclusions:** Compared to a historical control group, we found no differences in event-free survival or response rates among DLBCL patients who received one or more doses of accidentally diluted cyclophosphamide-containing chemotherapy.

## Introduction

Cyclophosphamide and gemcitabine are key components of several chemotherapeutic regimens used to treat many malignancies including non-Hodgkin's lymphoma and breast cancer. In March 2013, it was discovered that a labelling miscommunication between the drug compounder source and hospital pharmacies resulted in over-dilution and consequently unintentional under-dosing of gemcitabine and cyclophosphamide in several cancer centres in Ontario and New Brunswick. The exact extent of the under-dosing is unknown, but based on the dilution error, it is estimated that it could have resulted in a dose reduction anywhere between 3 and 20% (1,2). Overall, between March 2012 and March 2013, 1202 cancer patients received diluted chemotherapy. At our institution, 177 hematology patients were affected, the majority of whom were being treated for non-Hodgkin's lymphoma (3), with the largest subgroup being those with diffuse large B cell lymphoma (DLBCL).

This situation understandably created a great deal of anxiety and uncertainty amongst affected patients and their physicians. While dose reduction is a common practice in patients experiencing side effects of chemotherapy, there is little information on the potential effect such reductions might have on the response rate in these patients. Such data is necessary in order to provide reassurance to patients, and to guide further management decisions. Therefore, the goal of this project was to assess the impact (if any) of the cyclophosphamide under-dosing on disease response and clinical outcomes in our patients with DLBCL (the largest group affected among hematology patients). Our hypothesis was that a minor dose reduction of only 1 drug in a multi-agent chemotherapy regimen was likely to be inconsequential in terms of disease response.

## Methods

### *Study design and participants*

We conducted a retrospective cohort study at the London Regional Cancer Program (London, Ontario, Canada), including all consecutive patients treated for a newly diagnosed DLBCL with a first-line cyclophosphamide-containing regimen between March 2012 and March 2013, which was the period of time during which patients received diluted doses of cyclophosphamide. Patients were identified by searching the electronic pharmacy records. In order to compare response and survival rates, the cohort was compared with a historical group of patients with DLBCL treated during the 2 years preceding the under-dosing error. Patients and controls were matched for disease stage, and age ( $\pm 5$  years). Patients in both groups were excluded if they had received previous treatment for lymphoma. Data was extracted from charts using standardized case report forms. Data included patient demographics, lymphoma histology, stage, international prognostic index (4), chemotherapy regimen, number of cycles of chemotherapy given, any intentional dose reductions, infectious complications/febrile neutropenia rate, and other relevant clinical and laboratory variables. The study was approved by the Research Ethics Board at the University of Western Ontario.

### *Study outcomes*

The main outcome was event-free survival, defined as a composite of disease progression or death from the time of first chemotherapy. Secondary outcomes were overall and complete response rates. Disease response was assessed by the Cheson criteria (5).

Outcomes were adjudicated independently by two assessors blinded to the patient group

1  
2  
3 based on clinical, radiological, and pathological assessments, as appropriate.  
4

5  
6 Discrepancies were resolved by consensus with a third adjudicator.  
7

8  
9 ***Statistical analysis***  
10

11  
12 Baseline characteristics of the groups were described by using central tendency measures.  
13

14  
15 Continuous variables were compared between groups using unpaired Student's t-tests.  
16

17  
18 Categorical variables were compared using Chi-squared or Fisher's exact tests. Survival  
19

20  
21 analysis was done using the Kaplan-Meier method. Patients were censored at the time of  
22

23  
24 the last encounter. Groups were compared using the log-rank test. P-values < 0.05 were  
25

26  
27 considered as statistically significant. All analyses were conducted using SPSS Statistics  
28

29  
30 20 (IBM Corp. Armonk, NY, USA)  
31  
32  
33  
34  
35  
36  
37  
38  
39  
40  
41  
42  
43  
44  
45  
46  
47  
48  
49  
50  
51  
52  
53  
54  
55  
56  
57  
58  
59  
60

## Results

### *Patients' characteristics*

Between March 2012 and March 2013, eighty-one patients newly diagnosed with DLBCL received one or more doses of diluted cyclophosphamide during their treatments. Four patients were excluded because of loss to follow up. The study group was compared with 74 matched historical controls. There were no differences in the baseline characteristics between groups (**Table 1**). Approximately half of the patients were male and the mean age was 65 years. The majority of the patients were treated with a combination of cyclophosphamide, adriamycin, vincristine, prednisone and rituximab. The median number of cycles affected the by the cyclophosphamide dilution was 5 (interquartile range 1 to 8) which on average represented 79.5% (SD 28.6) of chemotherapy cycles. There was no statistically significant difference in the proportion of patients developing febrile neutropenia, needing chemotherapy dose reduction, or the need to use granulocytes colony stimulating factor (G-CSF).

### *Study Outcomes*

Survival analysis showed no difference in the main outcome at a median follow up of 548 days (log-rank  $P=0.999$ ) (**Figure1**). At the last follow up, progression or death occurred in 21 (27.3%) cases and 24 (32%) controls ( $P= 0.523$ ). Subgroup analyses did not find a difference in the main outcome in patients in whom more than 50% of the chemotherapy cycles were affected by under-dosing. At the completion of the treatment, an overall response was achieved in 55 (71.4%) cases and 50 (66.7%) controls ( $p=0.525$ ) whereas complete remission was observed in 41 (53.2%) cases and 43 (57.3%) controls ( $p=0.612$ ).

## Discussion

The present study shows that the response rate and event-free survival was not affected in a group of DLBCL patients affected by a minor reduction in the dose of cyclophosphamide compared to a historical control group. A potential limitation of our study is that the median follow up was relatively short although we feel is still meaningful given that most relapses of DLBCL occur within the first 2 years of treatment. We plan to continue following this group for a longer period of time.

Additionally, the group size is relatively small due to the unique study setting. However, a very similar historical control group provides further reassurance regarding the observed results.

Medication errors in chemotherapy drugs may result in significant adverse events due to their low therapeutic indices and high toxicity(6). Such errors are not an uncommon problem in cancer centers, with reports showing 7000 patients deaths and 80,000 hospitalizations annually in the United States (7), and similar results are reported in Canada (8). Errors may occur at any stage of the treatment process, from prescribing to administration. In a single centre prospective study, 141 chemotherapy medication errors occurred during the two-year study period, resulting in an error rate of 0.04% of all medication administrations. Twenty-one percent of these were order writing and transcribing errors, 38% were nurse or pharmacy dispensing errors, and 41% were nurse administration errors. Only three errors resulted in adverse drug events (9).

The sequence of events leading to the chemotherapy under-dosing in our study was the subject of a government investigation by the Ontario Ministry of Health and Long Term

1  
2  
3 Care (the Thiessen Report) (1,3). The under-dosing in our jurisdiction occurred after  
4 multiple hospitals changed their supplier of gemcitabine and cyclophosphamide. These  
5 cancer centres receive stock solution of chemotherapeutic drugs at a set concentration  
6 from the compounding pharmacy and then use this stock solution to prepare individual  
7 doses for multiple patients. The exact nature of the dilution error is best described by the  
8 Thiessen report as follows. “MHS (name of the drug supplier) employed a process in the  
9 preparation of the bulk reconstituted CYCLOPHOSPHAMIDE and GEMCITABINE that  
10 failed to compensate adequately for an overfill factor in the supplier’s normal saline bags.  
11 On the basis of the MHS labels on the bags (4000 mg per 100 mL bag for  
12 GEMCITABINE; 4000 mg per 200 mL bag for CYCLOPHOSPHAMIDE), the best  
13 estimate is that the average actual CYCLOPHOSPHAMIDE concentration was 10%  
14 lower than that stated on the label. For GEMCITABINE the average actual concentration  
15 was 7% lower than stated on the label. In the absence of clarifying patient-related  
16 instructions by MHS to the hospitals, the hospitals were not aware of the need to adjust  
17 doses accordingly to factor in the aforementioned lower concentrations. Thus, the overfill  
18 issue led directly to the patients under-dosing for both GEMCITABINE and  
19 CYCLOPHOSPHAMIDE.” By the time this error was discovered, over 1200 patients in  
20 4 cancer centres had already been treated with the incorrectly prepared drugs.  
21  
22  
23  
24  
25  
26  
27  
28  
29  
30  
31  
32  
33  
34  
35  
36  
37  
38  
39  
40  
41  
42  
43  
44  
45  
46  
47

48 Patients affected by this event experienced a great deal of anxiety and uncertainty in  
49 regards to the impact this error may have had on their treatment outcomes. The lack of  
50 existing evidence made it difficult for physicians to counsel their patients appropriately.  
51  
52  
53  
54  
55 Therefore, the motivation for doing this study was to provide reassurance to the patients  
56  
57  
58  
59  
60



1  
2  
3 who were affected by this incident, as well as to the medical community at large. We  
4  
5 chose diffuse large B-cell lymphoma because it is an aggressive neoplasm for which  
6  
7 disease response and survival can be assessed in a relatively short period of time unlike  
8  
9 indolent lymphomas or breast cancer, the latter being the largest group affected by the  
10  
11 dilution error. Our data showed no statistically significant difference in the response rate  
12  
13 or in event-free survival among DLBCL patients receiving one or more doses of  
14  
15 accidentally diluted cyclophosphamide, compared to a matched historical control group.  
16  
17 This suggests that a minor dose reduction in 1 drug in multi-agent chemotherapy may be  
18  
19 inconsequential in terms of disease response and risk of relapse, and although we cannot  
20  
21 conclude anything for the other groups of affected patients, it would be reasonable to  
22  
23 speculate that such patients would not have had an impact on disease response derived  
24  
25 from the accidental chemotherapy under-dosing. We believe that this data should provide  
26  
27 reassurance to the affected patients and their physicians.  
28  
29  
30  
31  
32  
33  
34  
35  
36  
37  
38  
39  
40  
41  
42  
43  
44  
45  
46  
47  
48  
49  
50  
51  
52  
53  
54  
55  
56  
57  
58  
59  
60

1  
2  
3 **Authorship:**  
4

5 Contribution: A.L-L, JM and LM designed the study; MA, AD and KL collected the data;  
6  
7  
8 A.L-L and MA analyzed the data; MA wrote the first draft of the manuscript; LM, A. L-  
9  
10 L, JM edited the manuscript. The authors had full access to all the data in the study and  
11  
12 take responsibility for the integrity of the data and the accuracy of the data analysis.  
13  
14  
15

16  
17 **Acknowledgment:** An abstract was submitted to the 56th Annual Meeting of the  
18  
19 American Society of Hematology, San Francisco CA, USA, December 2014. An abstract  
20  
21 has been published online in Blood 2014; 124 (21): Abstract 5441.  
22  
23  
24  
25  
26  
27  
28  
29  
30  
31  
32  
33  
34  
35  
36  
37  
38  
39  
40  
41  
42  
43  
44  
45  
46  
47  
48  
49  
50  
51  
52  
53  
54  
55  
56  
57  
58  
59  
60

## References

1. Thiessen J. A Review of the Oncology Under-Dosing Incident. A Report to the Ontario Minister of Health and Long-Term Care. Queen's Printer of Ontario 2013.  
Available at:  
[http://www.health.gov.on.ca/en/public/programs/cancer/drugsupply/docs/report\\_thiessen\\_oncology\\_under-dosing.pdf](http://www.health.gov.on.ca/en/public/programs/cancer/drugsupply/docs/report_thiessen_oncology_under-dosing.pdf). Date Accessed: June 9, 2015.
2. Andreatta D. Dilution of Chemo Drugs Was Result of 'Gaps in Communication,' Report Says. The Globe and Mail, August 7, 2013. Available at:  
<http://www.theglobeandmail.com/news/national/health-canada-should-regulate-chemotherapy-services-review/article13630197/>. Date Accessed: June 9, 2015.
3. Standing Committee on Social Policy, Legislative Assembly of Ontario. Diluted Chemotherapy Drugs. 2014. Available at: [http://www.ontla.on.ca/committee-proceedings/committee-reports/files\\_html/40\\_2\\_SP\\_DilutedChemo\\_01042014\\_en.htm](http://www.ontla.on.ca/committee-proceedings/committee-reports/files_html/40_2_SP_DilutedChemo_01042014_en.htm).  
Date Accessed: June 9, 2015.
4. Sehn LH, Berry B, Chhanabhai Met al. The revised International Prognostic Index (R-IPI) is a better predictor of outcome than the standard IPI for patients with diffuse large B-cell lymphoma treated with R-CHOP. Blood 2007;109:1857-1861.
5. Cheson BD, Fisher RI, Barrington SF et al. Recommendations for initial evaluation, staging, and response assessment of Hodgkin and non-Hodgkin lymphoma: the Lugano classification. J Clin Oncol 2014;32:3059-3068.
6. Ulas A, Silay K, Akinci S et al. Medication Errors in Chemotherapy Preparation and Administration: a Survey Conducted among Oncology Nurses in Turkey. Asian Pac J Cancer Prev 2015;16:1699-1705.

- 1  
2  
3 7. Kohn LT, Corrigan JM, Donaldson MS, editors. To Err is Human: Building a  
4 Safer Health System. National Academy Press, Washington, D.C., USA; 2000.  
5  
6
- 7  
8 8. Baker GR, Norton PG, Flintoft V et al. The Canadian Adverse Events Study: the  
9 incidence of adverse events among hospital patients in Canada. Can Med Assoc J  
10 2004;170:1678-1686.  
11  
12
- 13 9. Ford CD, Killebrew J, Fugitt P, Jacobsen J, Prystas EM. Study of medication  
14 errors on a community hospital oncology ward. J Oncol Pract 2006;2:149-154.  
15  
16
- 17 10. Maurer MJ, Ghesquieres H, Jais JP et al. Event-free survival at 24 months is a  
18 robust end point for disease-related outcome in diffuse large B-cell lymphoma treated  
19 with immunochemotherapy. J Clin Oncol 2014;32:1066-1073.  
20  
21  
22  
23  
24  
25  
26  
27  
28  
29  
30  
31  
32  
33  
34  
35  
36  
37  
38  
39  
40  
41  
42  
43  
44  
45  
46  
47  
48  
49  
50  
51  
52  
53  
54  
55  
56  
57  
58  
59  
60

1  
2  
3  
4  
5  
6 **Figure 1. Kaplan – Meier plot for the main study outcome**  
7

8  
9 **Figure 1 footnote. Patients were censored at the time of last follow up.**  
10  
11  
12  
13  
14  
15  
16  
17  
18  
19  
20  
21  
22  
23  
24  
25  
26  
27  
28  
29  
30  
31  
32  
33  
34  
35  
36  
37  
38  
39  
40  
41  
42  
43  
44  
45  
46  
47  
48  
49  
50  
51  
52  
53  
54  
55  
56  
57  
58  
59  
60

Confidential

**Table.1 Baseline characteristics of the study population**

|                                                 | <b>Patients affected by chemotherapy under-dosing<br/>N=77</b> | <b>Historical Controls<br/>N= 74</b> | <b>P value</b> |
|-------------------------------------------------|----------------------------------------------------------------|--------------------------------------|----------------|
| Male [N (%)]                                    | 39 (52)                                                        | 36 (48)                              | 0.87           |
| Age (Mean)                                      | 77 (SD ± 16)                                                   | 66 (SD±14)                           | 0.67           |
| Age > 60 years [N (%)]                          | 29 (37.7)                                                      | 24 (32.4)                            | 0.50           |
| LDH [Mean (SD)]                                 | 408 (375)                                                      | 394 (50)                             | 0.82           |
| WBC [Mean (SD)]                                 | 8.2 (4)                                                        | 7.5 (3)                              | 0.19           |
| Hemoglobin g/L[Mean (SD)]                       | 117 (22)                                                       | 120 (21)                             | 0.35           |
| Platelets x 10 <sup>9</sup> /L[Mean (SD)]       | 259 (175)                                                      | 253 (128)                            | 0.82           |
| Extra-nodal site involvement> 1 [N (%)]         | 18 (23.4)                                                      | 18 (24.3)                            | 0.89           |
| Stage III/IV [N (%)]                            | 53 (68.9)                                                      | 51 (68.8)                            | 0.99           |
| B-symptoms [N (%)]                              | 44 (57.1)                                                      | 43 (49.4)                            | 0.83           |
| ECOG ≥ 2 [N (%)]                                | 33 (42.9)                                                      | 36 (49.3)                            | 0.40           |
| Elevated LDH [N (%)]                            | 52 (67.5)                                                      | 43 (58.1)                            | 0.23           |
| High risk (R-IPI of score ≥3) [N (%)]           | 27 (35.1)                                                      | 28 (37.8)                            | 0.50           |
| CHOP-R-based chemotherapy                       | 71(92.2)                                                       | 68 (91.9)                            | 0.94           |
| Prescribed (intentional) dose reduction [N (%)] | 23 (30)                                                        | 25 (34.7)                            | 0.52           |
| Radiation therapy [N (%)]                       | 33 (42.9)                                                      | 34 (46.6)                            | 0.53           |
| Febrile neutropenia [N (%)]                     | 21 (27.3)                                                      | 15 (20.3)                            | 0.31           |
| G-CSF use [N (%)]                               | 48 (62.3)                                                      | 38 (53.5)                            | 0.28           |

**Abbreviations:** LDH: Lactate dehydrogenase, WBC: White blood cells, G-CSF: Granulocytes colony stimulating factor. ECOG: Eastern Cooperative Oncology Group, R-IPI: Revised International Prognostic Index, CHOP-R: cyclophosphamide adriamycin, vincristine, prednisone, rituximab

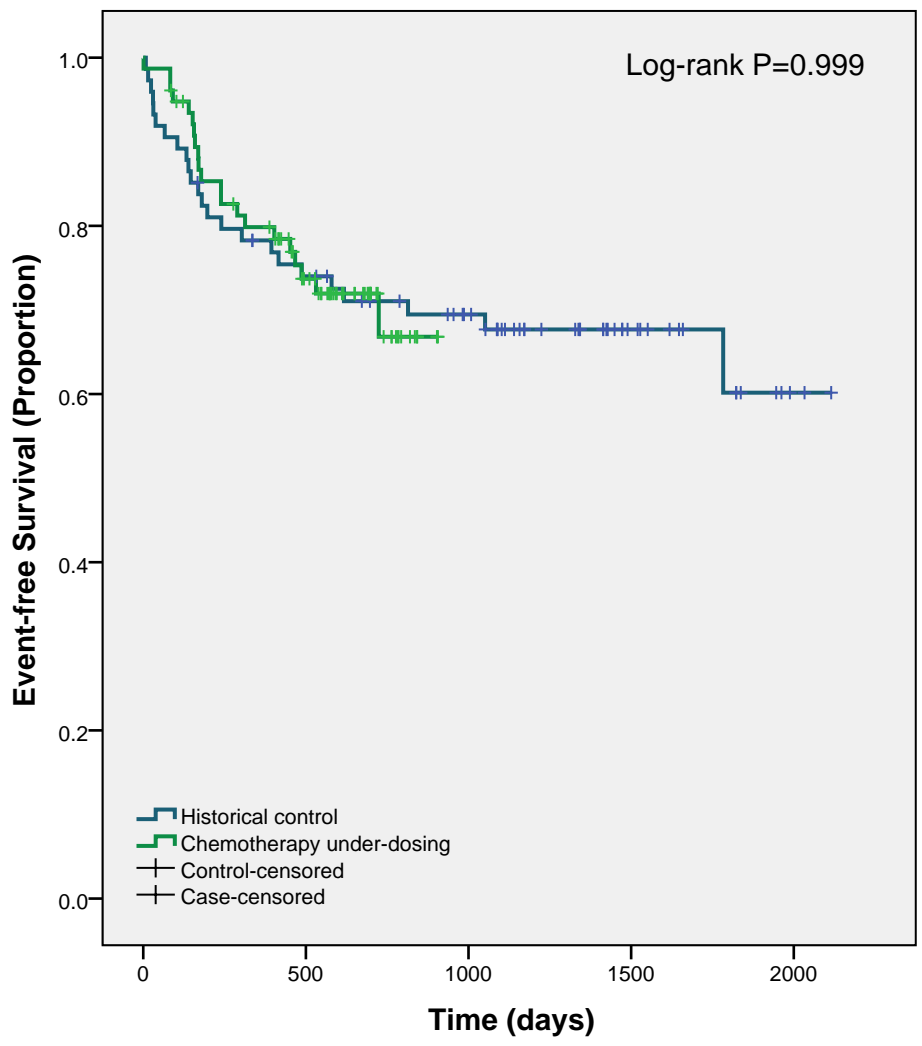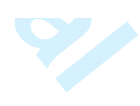

1  
2  
3  
4  
5  
6  
7  
8  
9  
10  
11  
12  
13  
14  
15  
16  
17  
18  
19  
20  
21  
22  
23  
24  
25  
26  
27  
28  
29  
30  
31  
32  
33  
34  
35  
36  
37  
38  
39  
40  
41  
42  
43  
44  
45  
46  
47  
48  
49  
50  
51  
52  
53  
54  
55  
56  
57  
58  
59  
60
